# Supplementary material for: Genetic variants in PTPRD and risk of gestational diabetes mellitus
Source: PubMed Central journal article supplement (PMC5340179; doi:10.18632/oncotarget.12599), 2016-10-12
Supplement: oncotarget-07-76101-s001.pdf [file oncotarget-07-76101-s001.pdf]

## Genetic variants in *PTPRD* and risk of gestational diabetes mellitus

### SUPPLEMENTARY TABLES

Supplementary Table S1: Stratified analyses on the combined effects of the three SNPs with GDM susceptibility

| Variables                               | 0/1–2/3-6 allele (s)         |                              | OR (95%CI)       | <i>P</i> <sup>b</sup> | OR (95%CI) <sup>a</sup> | <i>P</i> <sup>b</sup> |
|-----------------------------------------|------------------------------|------------------------------|------------------|-----------------------|-------------------------|-----------------------|
|                                         | GDM cases (n = 964)<br>N (%) | Controls (n = 1021)<br>N (%) |                  |                       |                         |                       |
| Age, year                               |                              |                              |                  |                       |                         |                       |
| ≤ 30                                    | 276/182/17                   | 332/241/46                   | 0.79 (0.65-0.97) | 0.805                 | 0.84 (0.68-1.03)        | 0.814                 |
| > 30                                    | 270/174/27                   | 206/152/34                   | 0.82 (0.66-1.02) |                       | 0.81 (0.65-1.01)        |                       |
| Pre-pregnancy<br>BMI, kg/m <sup>2</sup> |                              |                              |                  |                       |                         |                       |
| ≤ 22                                    | 277/190/23                   | 282/195/40                   | 0.87 (0.71-1.07) | 0.323                 | 0.87 (0.71-1.07)        | 0.416                 |
| > 22                                    | 269/166/21                   | 256/198/40                   | 0.75 (0.61-0.93) |                       | 0.77 (0.63-0.96)        |                       |
| Parity                                  |                              |                              |                  |                       |                         |                       |
| Nulliparae                              | 466/302/42                   | 502/367/74                   | 0.83 (0.71-0.97) | 0.421                 | 0.84 (0.72-0.98)        | 0.534                 |
| Multiparae                              | 80/54/2                      | 36/26/6                      | 0.67 (0.41-1.11) |                       | 0.70 (0.40-1.21)        |                       |
| Abnormal<br>pregnancy history           |                              |                              |                  |                       |                         |                       |
| No                                      | 479/315/37                   | 514/381/76                   | 0.80 (0.69-0.94) | 0.571                 | 0.81 (0.70-0.95)        | 0.324                 |
| Yes                                     | 67/41/7                      | 24/12/4                      | 0.95 (0.53-1.67) |                       | 1.13 (0.59-2.14)        |                       |
| Family history of<br>diabetes           |                              |                              |                  |                       |                         |                       |
| No                                      | 440/298/39                   | 466/330/70                   | 0.86 (0.73-1.00) | 0.108                 | 0.87 (0.74-1.03)        | 0.084                 |
| Yes                                     | 106/58/5                     | 72/63/10                     | 0.61 (0.41-0.89) |                       | 0.60 (0.41-0.89)        |                       |

Note: <sup>a</sup> Logistic regression analyses adjusted for age, pre-pregnancy BMI, parity, abnormal pregnancy history and family history of diabetes (excluded the stratified factor in each stratum). <sup>b</sup> *P*-value for the heterogeneity test. Abbreviations: GDM, gestational diabetes mellitus; SNP, single nucleotide polymorphism; BMI, body mass index.

Supplementary Table S2: Stratified analyses on rs10511544 with GDM susceptibility

| Variables                               | AA/CA/CC (N)                 |                              | OR (95%CI)       | P <sup>b</sup> | OR (95%CI) <sup>a</sup> | P <sup>b</sup> |
|-----------------------------------------|------------------------------|------------------------------|------------------|----------------|-------------------------|----------------|
|                                         | GDM cases (n = 964)<br>N (%) | Controls (n = 1021)<br>N (%) |                  |                |                         |                |
| Age, year                               |                              |                              |                  |                |                         |                |
| ≤ 30                                    | 283/182/18                   | 339/236/50                   | 0.79 (0.65-0.96) | 0.509          | 0.84 (0.69-1.03)        | 0.875          |
| > 30                                    | 279/166/30                   | 220/142/34                   | 0.87 (0.71-1.08) |                | 0.86 (0.69-1.06)        |                |
| Pre-pregnancy<br>BMI, kg/m <sup>2</sup> |                              |                              |                  |                |                         |                |
| ≤ 22                                    | 287/185/25                   | 294/187/43                   | 0.88 (0.72-1.08) | 0.419          | 0.87 (0.71-1.07)        | 0.576          |
| > 22                                    | 275/163/23                   | 265/191/41                   | 0.78 (0.63-0.96) |                | 0.80 (0.65-0.99)        |                |
| Parity                                  |                              |                              |                  |                |                         |                |
| Nulliparae                              | 478/299/ 44                  | 520/355/ 78                  | 0.85 (0.73-0.98) | 0.669          | 0.85 (0.73-0.99)        | 0.867          |
| Multiparae                              | 84/49/4                      | 39/23/6                      | 0.76 (0.46-1.23) |                | 0.81 (0.47-1.39)        |                |
| Abnormal<br>pregnancy history           |                              |                              |                  |                |                         |                |
| No                                      | 495/308/ 39                  | 534/367/ 80                  | 0.81 (0.70-0.94) | 0.361          | 0.82 (0.71-0.96)        | 0.244          |
| Yes                                     | 67/40/9                      | 25/11/4                      | 1.06 (0.61-1.86) |                | 1.21 (0.64-2.29)        |                |
| Family history of<br>diabetes           |                              |                              |                  |                |                         |                |
| No                                      | 454/291/42                   | 485/317/74                   | 0.87 (0.74-1.02) | 0.144          | 0.88 (0.75-1.04)        | 0.141          |
| Yes                                     | 108/57/ 6                    | 74/61/10                     | 0.64 (0.44-0.94) |                | 0.64 (0.43-0.94)        |                |

Note: <sup>a</sup> Logistic regression analyses adjusted for age, pre-pregnancy BMI, parity, abnormal pregnancy history and family history of diabetes (excluded the stratified factor in each stratum). <sup>b</sup> P -value for the heterogeneity test. Abbreviations: GDM, gestational diabetes mellitus; SNP, single nucleotide polymorphism; BMI, body mass index.

Supplementary Table S3: Stratified analyses on rs10756026 with GDM susceptibility

| Variables                            | TT/AT/AA (N)              |                           | OR (95%CI)       | <i>P</i> <sup>b</sup> | OR (95%CI) <sup>a</sup> | <i>P</i> <sup>b</sup> |
|--------------------------------------|---------------------------|---------------------------|------------------|-----------------------|-------------------------|-----------------------|
|                                      | GDM cases (n = 964) N (%) | Controls (n = 1021) N (%) |                  |                       |                         |                       |
| Age, year                            |                           |                           |                  |                       |                         |                       |
| ≤ 30                                 | 297/171/17                | 351/230/39                | 0.81 (0.66-0.99) | 0.935                 | 0.84 (0.68-1.04)        | 0.695                 |
| > 30                                 | 294/161/23                | 222/136/34                | 0.80 (0.64-0.99) |                       | 0.79 (0.63-0.98)        |                       |
| Pre-pregnancy BMI, kg/m <sup>2</sup> |                           |                           |                  |                       |                         |                       |
| ≤ 22                                 | 304/172/23                | 298/184/35                | 0.86 (0.70-1.06) | 0.365                 | 0.85 (0.69-1.05)        | 0.517                 |
| > 22                                 | 287/160/17                | 275/182/38                | 0.75 (0.61-0.93) |                       | 0.77 (0.62-0.95)        |                       |
| Parity                               |                           |                           |                  |                       |                         |                       |
| Nulliparae                           | 506/283/37                | 536/340/68                | 0.82 (0.70-0.96) | 0.486                 | 0.82 (0.70-0.96)        | 0.658                 |
| Multiparae                           | 85/49/3                   | 37/26/5                   | 0.68 (0.41-1.12) |                       | 0.72 (0.41-1.24)        |                       |
| Abnormal pregnancy history           |                           |                           |                  |                       |                         |                       |
| No                                   | 518/295/34                | 549/354/69                | 0.81 (0.69-0.94) | 0.968                 | 0.81 (0.69-0.95)        | 0.553                 |
| Yes                                  | 73/37/6                   | 24/12/4                   | 0.82 (0.46-1.45) |                       | 0.99 (0.52-1.88)        |                       |
| Family history of diabetes           |                           |                           |                  |                       |                         |                       |
| No                                   | 478/278/34                | 499/303/65                | 0.85 (0.72-0.99) | 0.115                 | 0.86 (0.73-1.02)        | 0.115                 |
| Yes                                  | 113/54/6                  | 74/63/8                   | 0.61 (0.42-0.90) |                       | 0.61 (0.41-0.90)        |                       |

Note: <sup>a</sup> Logistic regression analyses adjusted for age, pre-pregnancy BMI, parity, abnormal pregnancy history and family history of diabetes (excluded the stratified factor in each stratum). <sup>b</sup> *P*-value for the heterogeneity test. Abbreviations: GDM, gestational diabetes mellitus; SNP, single nucleotide polymorphism; BMI, body mass index.

Supplementary Table S4: Stratified analyses on rs10809070 with GDM susceptibility

| Variables                               | CC/GC/GG (N)                 |                              | OR (95%CI)       | P <sup>b</sup> | OR (95%CI) <sup>a</sup> | P <sup>b</sup> |
|-----------------------------------------|------------------------------|------------------------------|------------------|----------------|-------------------------|----------------|
|                                         | GDM cases (n = 964)<br>N (%) | Controls (n = 1021)<br>N (%) |                  |                |                         |                |
| Age, year                               |                              |                              |                  |                |                         |                |
| ≤ 30                                    | 335/137/4                    | 418/179/27                   | 0.78 (0.62-0.98) | 0.941          | 0.82 (0.65-1.04)        | 0.778          |
| > 30                                    | 356/104/12                   | 282/94/20                    | 0.79 (0.62-1.02) |                | 0.78 (0.60-1.00)        |                |
| Pre-pregnancy<br>BMI, kg/m <sup>2</sup> |                              |                              |                  |                |                         |                |
| ≤ 22                                    | 351/132/8                    | 359/139/26                   | 0.80 (0.64-1.01) | 0.649          | 0.81 (0.64-1.03)        | 0.720          |
| > 22                                    | 340/109/8                    | 341/134/21                   | 0.74 (0.58-0.95) |                | 0.76 (0.59-0.98)        |                |
| Parity                                  |                              |                              |                  |                |                         |                |
| Nulliparae                              | 588/208/16                   | 653/255/44                   | 0.80 (0.67-0.95) | 0.447          | 0.80 (0.67-0.96)        | 0.617          |
| Multiparae                              | 103/33/0                     | 47/18/3                      | 0.63 (0.35-1.14) |                | 0.67 (0.34-1.30)        |                |
| Abnormal<br>pregnancy history           |                              |                              |                  |                |                         |                |
| No                                      | 612/207/13                   | 669/266/45                   | 0.74 (0.62-0.89) | 0.136          | 0.75 (0.63-0.90)        | 0.075          |
| Yes                                     | 79/34/3                      | 31/7/2                       | 1.29 (0.64-2.64) |                | 1.53 (0.71-3.28)        |                |
| Family history of<br>diabetes           |                              |                              |                  |                |                         |                |
| No                                      | 566/200/13                   | 601/233/41                   | 0.78 (0.65-0.94) | 0.823          | 0.80 (0.66-0.96)        | 0.790          |
| Yes                                     | 125/41/3                     | 99/40/6                      | 0.74 (0.49-1.14) |                | 0.75 (0.48-1.15)        |                |

Note: <sup>a</sup> Logistic regression analyses adjusted for age, pre-pregnancy BMI, parity, abnormal pregnancy history and family history of diabetes (excluded the stratified factor in each stratum). <sup>b</sup> P-value for the heterogeneity test. Abbreviations: GDM, gestational diabetes mellitus; SNP, single nucleotide polymorphism; BMI, body mass index.

**Supplementary Table S5: Linkage disequilibrium (LD) information of the three SNPs**

| SNP        | rs10511544         | rs10756026         | rs10809070         |
|------------|--------------------|--------------------|--------------------|
| rs10511544 | --                 | 0.907 <sup>a</sup> | 0.943 <sup>a</sup> |
| rs10756026 | 0.782 <sup>b</sup> | --                 | 0.869 <sup>a</sup> |
| rs10809070 | 0.535 <sup>b</sup> | 0.483 <sup>b</sup> | --                 |

<sup>a</sup> D'; <sup>b</sup> R<sup>2</sup>

Supplementary Table S6 Information of primers for Sequenom MassARRAY iPLEX assays

| SNP_ID     | 2nd-PCR Primer                      | 1st-PCR Primer                      | Extend Primer                    |
|------------|-------------------------------------|-------------------------------------|----------------------------------|
| rs17584499 | ACGTTGGATGCTTCCT<br>TTAAACAGTACACC  | ACGTTGGATGTGGGCCCA<br>AGAAAAGACAAC  | AAACAGTACACCTTTCTGTATT           |
| rs649891   | ACGTTGGATGAAATTAG<br>GACATTCAACAC   | ACGTTGGATGGAGGTATT<br>TGTTGTTGTATA  | GATTTAGTCTCTTATA<br>TTAAGATAGTC  |
| rs10511544 | ACGTTGGATGGGTTGG<br>CACTGTTTGAACCTG | ACGTTGGATGGGGTTTAGCT<br>AAAATGCTTGG | TGATGATAATATGAA<br>TTAACTTATGG   |
| rs10756026 | ACGTTGGATGGCATT<br>TCTTAACACTTTCC   | ACGTTGGATGGTTTGCGT<br>TTTTCCCAACAAG | AACACTTTCCTAAT<br>ATAAAATTTTTTTT |
| rs10809070 | ACGTTGGATGCATTCT<br>TGATGTACTTTC    | ACGTTGGATGCTTTCGGT<br>ATTGATTTGTCC  | GGTAAGCCTTAGT<br>AACTGATTA       |
| rs12345848 | ACGTTGGATGTGCTAATT<br>GTGACGCTACCC  | ACGTTGGATGGATGGTTT<br>CTATAGTTTAGAC | TTGTCAATTTTTACCTTTGGT            |
| rs1323500  | ACGTTGGATGCCCAAATA<br>AAAGCATTTC    | ACGTTGGATGCTCAAGCA<br>TAGTAGAAAAACC | GCATTTTCCAACCTTTGATAATTTT        |
| rs628731   | ACGTTGGATGCCTGAGTT<br>CTAACTTGATTG  | ACGTTGGATGAAACACTCC<br>TCAGGGAATGC  | AGAGACTGTTTGTTATGATTGC           |
